# Supplementary material
Source: MDPI journal article supplement (https://www.mdpi.com/2076-3263/12/10/362)
Supplement: s1 [file s1]

# A Selection Method for Restoration Mortars Using Sustainability and Compatibility Criteria

José Diaz-Basteris <sup>1,\*</sup>, Beatriz Menéndez <sup>1,\*</sup>, Javier Reyes <sup>2</sup> and Julio C. Sacramento Rivero <sup>3</sup>

<sup>1</sup> Geosciences and Environment Cergy, CY Cergy Paris Université, Neuville sur Oise France. CP : 95000

<sup>2</sup> LANCIC-CICORR, Universidad Autónoma de Campeche, Campeche, Mexico; CP: 24000

<sup>3</sup> Faculty of Chemical Engineering, Universidad Autónoma de Yucatán, Mérida Mexico. CP: 97000

\* Correspondence: jose.diaz-basteris@cyu.fr (J.D.-B.);

beatriz.menendez@cyu.fr (B.M.); Tel. +33-767-068-896 (J.D.-B.)

**Table S1.** Colour of Mortars in green the mortars with less than 10 and in blue commercial mortars.

|    | Sample         | L     | a     | b     | ΔE       | ΔE      | ΔE      | ΔE      | ΔE           | ΔE           | ΔE       |
|----|----------------|-------|-------|-------|----------|---------|---------|---------|--------------|--------------|----------|
|    |                |       |       |       | Lutetian | Oxpemul | Euville | Mayapan | Dzibichaltun | Chichen Itzá | Calakmul |
| 1  | HFD            | 74.52 | 2.63  | 10.04 | 9.2      | 2.3     | 14.0    | 8.8     | 3.6          | 4.0          | 2.9      |
| 2  | HSD            | 74.14 | 2.72  | 11.52 | 8.1      | 1.1     | 14.8    | 8.5     | 2.5          | 3.2          | 2.0      |
| 3  | HS             | 72.88 | 2.55  | 9.93  | 10.2     | 3.1     | 15.6    | 7.2     | 4.4          | 5.2          | 1.9      |
| 4  | HB             | 62.85 | 10.71 | 11.47 | 18.8     | 14.7    | 27.3    | 8.4     | 14.3         | 15.9         | 12.1     |
| 5  | HCSR           | 84.17 | 1.41  | 5.95  | 13.4     | 11.3    | 4.1     | 19.1    | 11.7         | 10.5         | 13.4     |
| 6  | HCS            | 81.1  | 1.83  | 7.954 | 10.5     | 7.6     | 7.1     | 15.7    | 8.1          | 7.0          | 9.8      |
| 7  | HSG            | 82.19 | 1.44  | 6.19  | 12.6     | 9.6     | 6.0     | 17.1    | 10.1         | 9.1          | 11.5     |
| 8  | HSP            | 82.66 | 1.64  | 8.46  | 10.5     | 8.7     | 5.7     | 17.1    | 9.0          | 7.7          | 11.1     |
| 9  | HC             | 82.19 | 2.12  | 9.11  | 9.7      | 8.0     | 6.4     | 16.6    | 8.2          | 6.9          | 10.4     |
| 10 | HCSGB          | 81.74 | 3.19  | 9.13  | 9.4      | 7.7     | 7.0     | 16.1    | 7.6          | 6.4          | 9.9      |
| 11 | AS             | 87.55 | 1.18  | 7.55  | 13.9     | 13.6    | 1.0     | 22.1    | 13.7         | 12.3         | 16.0     |
| 12 | AHCS           | 83.09 | 1.69  | 8.7   | 10.5     | 9.0     | 5.4     | 17.5    | 9.2          | 7.9          | 11.4     |
| 13 | ACSGB          | 87.05 | 2.38  | 5.93  | 14.7     | 13.8    | 1.6     | 21.9    | 13.8         | 12.6         | 16.0     |
| 14 | OAC *          | 84.49 | 1.74  | 8.55  | 11.2     | 10.4    | 4.0     | 18.9    | 10.5         | 9.1          | 12.8     |
| 15 | AC             | 86.53 | 1.81  | 8.35  | 12.5     | 12.4    | 2.2     | 21.0    | 12.3         | 11.0         | 14.8     |
| 16 | AS2            | 81.32 | 1.16  | 7.26  | 11.4     | 8.3     | 6.8     | 16.1    | 8.9          | 7.8          | 10.3     |
| 17 | H3.5CS         | 84.21 | 2.22  | 9.79  | 10.0     | 9.7     | 4.9     | 18.5    | 9.6          | 8.2          | 12.2     |
| 18 | H3.5CS2        | 86.84 | 1.78  | 8.84  | 12.4     | 12.5    | 2.4     | 21.2    | 12.5         | 11.1         | 15.0     |
| 19 | H3.5CS3        | 87.94 | 1.25  | 7.42  | 14.2     | 14.0    | 0.7     | 22.5    | 14.1         | 12.7         | 16.4     |
| 20 | H3.5CS4        | 85.96 | 1.73  | 7.89  | 12.6     | 12.0    | 2.4     | 20.5    | 12.0         | 10.7         | 14.4     |
| 21 | H3.5CS5        | 87.65 | 1.31  | 7.22  | 14.2     | 13.8    | 0.7     | 22.3    | 13.9         | 12.6         | 16.2     |
| 22 | H3.5CSG        | 84.94 | 1.82  | 10.04 | 10.3     | 10.4    | 4.5     | 19.3    | 10.3         | 8.9          | 12.9     |
| 23 | H3.5CSB        | 83.28 | 3.43  | 9.76  | 9.5      | 8.9     | 5.9     | 17.6    | 8.6          | 7.4          | 11.3     |
| 24 | H3.5CSGB       | 79.02 | 4.72  | 12.68 | 5.6      | 4.9     | 11.2    | 13.6    | 3.7          | 2.7          | 7.2      |
| 25 | Lithomex       | 79.5  | 2.31  | 11.23 | 7.0      | 4.8     | 9.7     | 13.8    | 4.9          | 3.5          | 7.4      |
| 26 | Artropierre    | 88.04 | 0.81  | 6.37  | 15.2     | 14.6    | 1.0     | 22.8    | 14.7         | 13.4         | 16.9     |
| 27 | Altar Pierre   | 75.64 | 1.94  | 10.39 | 8.5      | 2.1     | 13.0    | 10.0    | 3.5          | 3.4          | 3.8      |
| 28 | Lutetian stone | 78.84 | 3.43  | 18.12 | 0.0      | 7.2     | 14.7    | 15.2    | 6.0          | 5.3          | 9.3      |
| 29 | Oxpemul        | 74.81 | 2.21  | 12.28 | 7.2      | 0.0     | 14.4    | 9.3     | 2.1          | 2.5          | 2.8      |
| 30 | Euville stone  | 88.14 | 1.64  | 6.86  | 14.7     | 14.4    | 0.0     | 22.8    | 14.4         | 13.1         | 16.7     |
| 31 | Mayapan        | 65.7  | 2.87  | 10.6  | 15.15    | 9.29    | 22.78   | 0.0     | 10.1         | 11.4         | 6.6      |
| 32 | Dzibichaltun   | 75.4  | 4.06  | 13.2  | 6.04     | 2.15    | 14.43   | 10.1    | 0.0          | 1.6          | 3.8      |
| 33 | Chichen Itzá   | 76.8  | 3.305 | 13.23 | 5.30     | 2.46    | 13.11   | 11.42   | 1.59         | 0.0          | 4.9      |
| 34 | Calakmul       | 72.16 | 2.91  | 11.7  | 9.28     | 2.80    | 16.75   | 6.55    | 3.75         | 4.9          | 0.0      |

**Table S2.** Physical and mechanical properties of limestones.  $\rho$ : density ( $\text{kg/m}^3$ ),  $n$ : open porosity (%),  $C$ : Capillarity coefficient ( $\text{Kg/m}^2\text{s}^{1/2}$ ),  $S$ : Compressive Strength (MPa) standard deviation (SD), the values for mayan stones are taken from Che-Novelo[69] and the values for commercial mortars from Tangith-Hammou [70] and Lopez-Arce [12]

| Mortar         | $\rho$ | SD $\rho$ | $n$ | SD $n$ | $C$  | SD $C$ | $S$ 180 | SD $S$ -180 |
|----------------|--------|-----------|-----|--------|------|--------|---------|-------------|
| Lutetian stone | 1617   | 19        | 37  | 0.8    | 0.35 | 0.04   | 8.5     | 0.83        |
| Euville stone  | 1943   | 48        | 19  | 1.4    | 0.46 | 0.02   | 8.6     | 1.2         |
| Mayapan        | -      | -         | -   | -      | -    | -      | -       | -           |
| Dzibichaltun   | 2310   | 12        | 12  | 0.5    | 0.46 | 0.06   | 8       | 0.6         |
| Chichen Itzá   | -      | -         | -   | -      | -    | -      | -       | -           |
| Calakmul       | 1970   | 60        | 25  | 2      | 0.3  | 0.03   | 4.31    | 0.7         |
| Oxpemul        | 1520   | 173       | 42  | 6.63   | 0.55 | 0.06   | 12.5    | 0.7         |

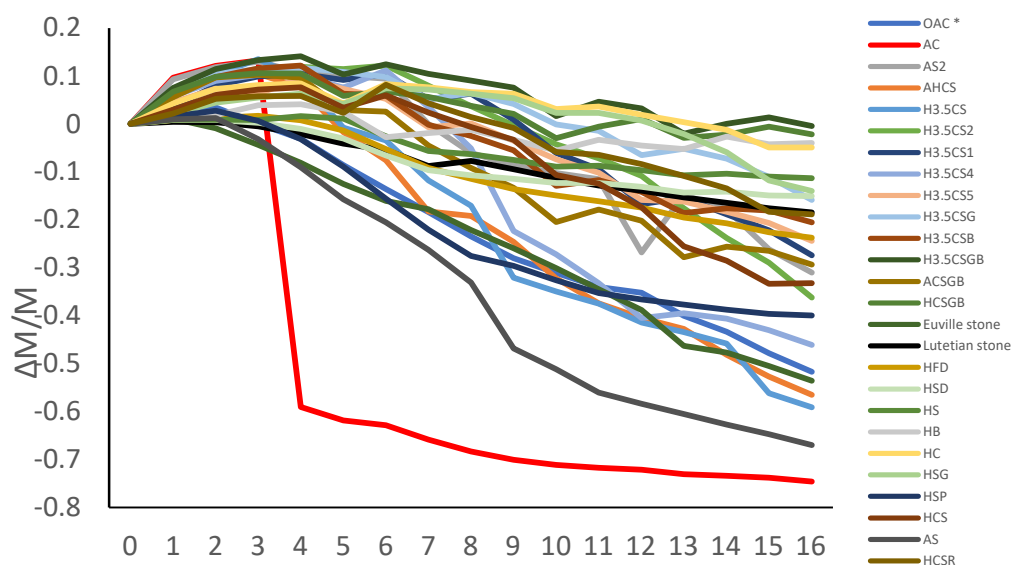

**Figure S1.** Durability of restoration mortars in salt crystallization test.

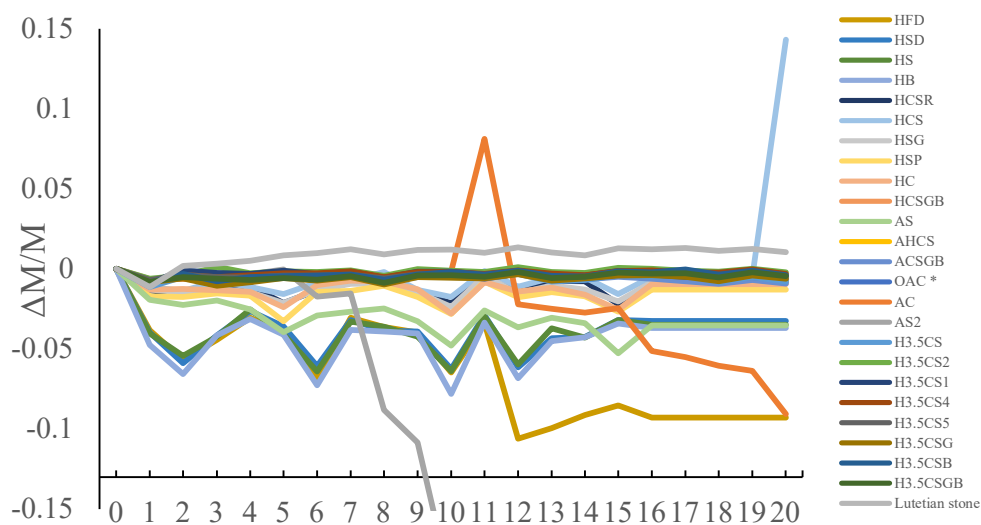

**Figure S2.** Durability of restoration mortars in freezing thawing test.

**Table S3.** Mass difference in the Durability of restoration mortars after the last cycle.

| Mortar Formulation | $\Delta M/M$ Salt Crystallization | $\Delta M/M$ Freezing Thawing |
|--------------------|-----------------------------------|-------------------------------|
|                    | Cycle 16                          | Cycle 20                      |
| HFD                | -0.24                             | -0.04                         |
| HSD                | -0.15                             | -0.03                         |
| HS                 | -0.11                             | -0.03                         |
| HB                 | -0.04                             | -0.04                         |
| HSCR               | -0.19                             | -0.01                         |
| HCS                | -0.33                             | 0.14                          |
| HSG                | -0.14                             | -0.01                         |
| HSP                | -0.40                             | -0.01                         |
| HC                 | -0.05                             | -0.01                         |
| HCSGB              | -0.02                             | 0.00                          |
| AS                 | -0.67                             | -0.04                         |
| AHCS               | -0.56                             | -0.01                         |
| ACSGB              | -0.29                             | -0.01                         |
| OAC *              | -0.52                             | -0.01                         |
| AC                 | -0.75                             | -0.09                         |
| AS2                | -0.31                             | -0.56                         |
| H3.5CS             | -0.59                             | -0.01                         |
| H3.5CS2            | -0.36                             | 0.00                          |
| H3.5CS3            | -0.27                             | 0.00                          |
| H3.5CS4            | -0.46                             | 0.00                          |
| H3.5CS5            | -0.24                             | -0.01                         |
| H3.5CSG            | -0.16                             | -0.01                         |
| H3.5CSB            | -0.21                             | 0.00                          |
| H3.5CSGB           | 0.00                              | 0.00                          |

Using equation 4, Table 3 and Table 8

$$GWP \text{ (kg CO}_2 \text{ eq/t)} = \sum M_i EF_i$$

(2)

The composition of the mortar and the distance, calculation for HFD mortar is as follows

$$\text{Row materials GWP} \left( \text{kg} \frac{\text{CO}_2 \text{ eq}}{\text{t}} \right) = 200 * 0.74 + 200 * 0.07 + 600 * 0.05 = 192 \text{ kg CO}_2 \text{ eq}$$

For the transport we use the calculated distance in Table 8

$$\text{Transport and Disposal GWP} \left( \text{kg} \frac{\text{CO}_2 \text{ eq}}{\text{t}} \right) = 0.2 * 790 * 0.368 + 0.2 * 90 * 0.368 + 0.6 * 55 * 0.368 + 1 * 65 * 0.368 = 101 \text{ kg CO}_2 \text{ eq} \quad \text{giving a total of } 293 \text{ kg CO}_2 \text{ eq/t}$$

**Table S4.** Emission factors of inputs [49.]

| Inputs                    | Unit                      | EF    |
|---------------------------|---------------------------|-------|
| Portland Cement           | kg CO <sub>2</sub> eq/kg  | 1.53  |
| CL90                      | kg CO <sub>2</sub> eq/kg  | 0.98  |
| NHL5                      | kg CO <sub>2</sub> eq/kg  | 0.74  |
| NHL3.5                    | kg CO <sub>2</sub> eq/kg  | 0.64  |
| Silica Sand               | kg CO <sub>2</sub> eq/kg  | 0.045 |
| Calcareous Sand           | kg CO <sub>2</sub> eq/kg  | 0.03  |
| Silico-Calcareous Sand    | kg CO <sub>2</sub> eq/kg  | 0.05  |
| Fine Silica Sand          | kg CO <sub>2</sub> eq/kg  | 0.07  |
| Transport (raw materials) | kg CO <sub>2</sub> eq/tkm | 0.368 |
| Transport (disposal)      | kg CO <sub>2</sub> eq/tkm | 0.368 |

**Table S5.** LCA calculation of a restoration mortar.

| Raw material           | Mortar Formulations in Kg |        |       |           |             |              |
|------------------------|---------------------------|--------|-------|-----------|-------------|--------------|
|                        | 1(HFD)                    | 2(HSD) | 9(HC) | 17(HCSGB) | 23(H3.5CSB) | 24(H3.5CSGB) |
| NH15                   | 200                       | 200    | 300   | 300       |             |              |
| NH13.5                 |                           |        |       |           | 300         | 300          |
| Sand F                 | 200                       | 150    |       |           |             |              |
| Sand S                 |                           | 650    |       | 250       | 300         | 250          |
| Sand C                 |                           |        | 700   | 250       | 300         | 250          |
| Sand D                 | 600                       |        |       |           |             |              |
| G                      |                           |        |       | 100       |             | 100          |
| B                      |                           |        |       | 100       | 100         | 100          |
| Row materials          | 192                       | 188    | 243   | 241       | 215         | 211          |
| Transport and Disposal | 101                       | 136    | 128   | 136       | 141         | 136          |
| TOTAL                  | 293                       | 324    | 371   | 377       | 355         | 347          |

**Table S6.** Additives normally use in mortars.

| Additive                        | Properties                                                                                                                                                                                                                                                                                                                                                                                                                                                                              | Reference     |
|---------------------------------|-----------------------------------------------------------------------------------------------------------------------------------------------------------------------------------------------------------------------------------------------------------------------------------------------------------------------------------------------------------------------------------------------------------------------------------------------------------------------------------------|---------------|
| Plasticizers                    | Lignosulfonates and Polycarboxylates are powerful water reducers, likewise plasticize or fluidize. They are used in special mortars, tile joint fillers, cement plates, plasterboards, and in general they can be used where it is required to achieve high mechanical properties without the need for vibration                                                                                                                                                                        | [71]          |
| Waterproofing                   | Water repellents based on the chemical sodium oleate is ideal for Stucco that must be used as protection against water. Effect is almost immediate, 7 days after application.<br>Water permeability reducer, for stuccoes and cementitious nozzles where it is required to protect against water absorption Immediate and durable effect for 2-3 years.                                                                                                                                 | [72]          |
| Cellulose                       | HPMC and HEMC cellulose ethers are usually used to maintain water content in mortars at high levels. These molecules also contribute to good mechanical strength of the final material.                                                                                                                                                                                                                                                                                                 | [73]          |
| Organic additions               | Different organics additions in the lime matrix have demonstrated enhances the mechanical properties of the mortar significantly as it improves the binding strength between two consecutive lime particles in the mortar.                                                                                                                                                                                                                                                              | [74–78]       |
| Acrylate resin powder           | It contributes to increase mechanical properties of adherence, flexibility, modulus of elasticity, impact resistance and hardness. It is ideal for protection against UV rays, and high resistance to humidity.                                                                                                                                                                                                                                                                         | [79,80]       |
| Starch                          | Highly substituted natural polysaccharide, designed to improved functional properties including: solution stability, salt tolerance, area of activity, water retention, viscosity and improved its rheology.                                                                                                                                                                                                                                                                            | [81]          |
| Fibers                          | The fibers are used to obtain better consistency control, It increases flexibility and adherence, it does not affect the water-cement ratio. The polyester fiber continues working once the mortar has set and hardened.                                                                                                                                                                                                                                                                | [82,83]       |
| Dispersants                     | Naphthalene sulfonate, a high molecular weight dispersant for the dispersion of cement. Water reducer for mortars.                                                                                                                                                                                                                                                                                                                                                                      | [84–87]       |
| Anti-foaming                    | White cellulose fiber ideal for ceramic adhesives and stucco, increases open time and drying time. It reduces the sagging of the putties and the formation of cracks.                                                                                                                                                                                                                                                                                                                   | [88]          |
| Pigments                        | Material that changes the colour of the light that is reflected or transmits as a result of the selective light absorption according to its wavelength.                                                                                                                                                                                                                                                                                                                                 | [89,90]       |
| Pozzolans and mineral additions | The use of waste materials to fill the role of an aggregate filler or pozzolan have grown in importance in recent years, as have metakaolin, ground glass and clays. Increasing mechanical properties of lime-based mortars.                                                                                                                                                                                                                                                            | [67,91,92]    |
| Nanoparticles                   | Many nanosized products have been tested in the construction industry such as, nanosilica (SiO <sub>2</sub> ) nanotitania (TiO <sub>2</sub> ) cellulose nanofibers ((C <sub>6</sub> H <sub>10</sub> O <sub>5</sub> ) <sub>n</sub> ) and nanolime (Ca(OH) <sub>2</sub> ). Nanoparticles have very high specific surface area and their properties and effects on physical properties and chemical reactions may vary from those of the same materials with micro/millimetric dimensions. | [71,82,93–96] |

Natural and synthetic latex have been used successfully in order to produce proprietary mortars, screeds and surface coatings. These are often used to produce chemically resistant floor toppings, styrene butadiene latex is used to improve bonding in many substrates and other polymeric resins, such as acrylic polymers, polyvinyl acetate and epoxy resins.

**Table S7.** XRAY composition of raw materials and admixtures.

| Formula                                                                                                                                         | Compound Name              | NH15   | CL90   | Sand D | Sand F | Sand S | Sand C | B      | G      |
|-------------------------------------------------------------------------------------------------------------------------------------------------|----------------------------|--------|--------|--------|--------|--------|--------|--------|--------|
| Si O <sub>2</sub>                                                                                                                               | Quartz                     | 6.70%  |        | 96.80% | 82.00% | 88.80% | 7.20%  | 67.60% | 99.00% |
| Ca C O <sub>3</sub>                                                                                                                             | Calcite                    | 30.00% | 11.60% |        | 14.70% | 4.50%  | 89.50% |        | 0.50%  |
| Ca C O <sub>3</sub>                                                                                                                             | Aragonite                  |        |        |        |        |        | 1.40%  |        |        |
| Ca ( O H ) <sub>2</sub>                                                                                                                         | Portlandite                | 14.10% | 88.40% |        |        |        |        |        | 0.50%  |
| Ca <sub>3</sub> Si O <sub>5</sub>                                                                                                               | Alite                      | 17.50% |        |        |        |        |        |        |        |
| Ca <sub>2</sub> Si O <sub>4</sub>                                                                                                               | Belite/ Larnite            | 12.80% |        |        |        |        |        |        |        |
| K <sub>2</sub> Ca <sub>6</sub> Si <sub>4</sub> O <sub>15</sub>                                                                                  | Potassium Calcium Silicate | 7.30%  |        |        |        |        |        |        |        |
| Ca <sub>2</sub> Al <sub>2</sub> Si O <sub>7</sub>                                                                                               | Gehlenite                  | 7.20%  |        |        |        |        |        |        |        |
| Ca <sub>2</sub> Mg <sub>0.05</sub> Fe <sub>0.95</sub> Al <sub>0.95</sub> Si <sub>0.05</sub> O <sub>5</sub>                                      | Brownmillerite             | 4.40%  |        |        |        |        |        |        |        |
| (Na <sub>0.7</sub> K <sub>0.3</sub> )(Al <sub>1.02</sub> Si <sub>2.98</sub> O <sub>8</sub> )                                                    | Albite potassian           |        |        | 3.20%  | 3.30%  |        |        | 7.20%  |        |
| Na(AlSi <sub>3</sub> O <sub>8</sub> )                                                                                                           | albite sodium              |        |        |        |        | 2.50%  |        |        |        |
| CaAl <sub>2</sub> Si <sub>2</sub> O <sub>8</sub>                                                                                                | Anorthite ordered          |        |        |        |        | 4.20%  |        | 12.30% |        |
| CaAl <sub>2</sub> Si <sub>7</sub> O <sub>18</sub> 7.5H <sub>2</sub> O                                                                           | heulandite                 |        |        |        |        |        |        | 6.80%  |        |
| Fe <sub>2</sub> O <sub>3</sub>                                                                                                                  | hematite                   |        |        |        |        |        |        | 1.90%  |        |
| Al <sub>3.2</sub> Ca <sub>3.4</sub> Fe <sub>4</sub> K <sub>0.6</sub> Mg <sub>6</sub> Na Si <sub>12.8</sub> O <sub>44</sub> ( O H ) <sub>4</sub> | amphibiole                 |        |        |        |        |        |        | 2.50%  |        |
| Na <sub>2</sub> Fe <sub>3</sub> Fe <sub>2</sub> Si <sub>8</sub> O <sub>22</sub> ( O H ) <sub>2</sub>                                            | Riebeckite                 |        |        |        |        |        |        | 1.70%  |        |
| Ca Mg <sub>0.46</sub> Fe <sub>0.54</sub> ( C O <sub>3</sub> ) <sub>2</sub>                                                                      | Ankerite, magne-sian       |        |        |        |        |        | 1.90%  |        |        |

**Table S8.** Distance of the raw materials for Mayan monuments.

| Raw Material                  | Company                              | Factory location                                           | Distance to Dzibichaltun (Km) |
|-------------------------------|--------------------------------------|------------------------------------------------------------|-------------------------------|
| <b>Air Lime</b>               | Productora de cal de Yucatán         | Km. 6 Carretera Mérida-Cholul, Yucatán, 97300              | 14                            |
| <b>Hydraulic Lime</b>         | Granding International               | Exuberancia 10, La Esmeralda, Jiutepec, Morelos, 62555     | 1347                          |
| <b>Calcareous Sand</b>        | MAPSA                                | Anillo periferico sur km 8, Mérida, Yucatán 97300          | 37                            |
| <b>Silica Sand</b>            | Arena Silica del Golfo               | Carretera Fenquimia km 01-80, Cosoleacaque, Veracruz, 9634 | 760                           |
| <b>Silica-Calcareous Sand</b> | mix MAPSA and Arena silica del Golfo | mix CP: 97300 and 9634                                     | 616                           |
| <b>Silica -Fine Sand</b>      | Arena Silica del Golfo               | Carretera Fenquimia km 01-80, Cosoleacaque, Veracruz, 9634 | 760                           |
| Raw Material                  | Company                              | Factory Location                                           | Distance to Calakmul (Km)     |
| <b>Air Lime</b>               | Productora de cal de Yucatán         | Km. 6 Carretera Mérida-Cholul, Yucatán, 97300              | 458                           |
| <b>Hydraulic Lime</b>         | Granding International               | Exuberancia 10, La Esmeralda, Jiutepec, Morelos, 62555     | 1200                          |
| <b>Calcareous Sand</b>        | MAPSA                                | Anillo periferico sur km 8, Mérida, Yucatán 97300          | 439                           |
| <b>Silica Sand</b>            | Arena Silica del Golfo               | Arena Silica del Golfo                                     | 612                           |
| <b>Silica-Calcareous Sand</b> | mix MAPSA and Arena silica del Golfo | mix CP: 97300 and 9634                                     | 578                           |
| <b>Silica -Fine Sand</b>      | Arena Silica del Golfo               | Carretera Fenquimia km 01-80, Cosoleacaque, Veracruz, 9634 | 612                           |
| Raw Material                  | Company                              | Factory Location                                           | Distance to Ox-pemul (Km)     |
| <b>Air Lime</b>               | Productora de cal de Yucatán         | Km. 6 Carretera Mérida-Cholul, Yucatán, 97300              | 488                           |
| <b>Hydraulic Lime</b>         | Granding International               | Exuberancia 10, La Esmeralda, Jiutepec, Morelos, 62555     | 1230                          |
| <b>Calcareous Sand</b>        | MAPSA                                | Anillo periferico sur km 8, Mérida, Yucatán 97300          | 470                           |
| <b>Silica Sand</b>            | Arena Silica del Golfo               | Carretera Fenquimia km 01-80, Cosoleacaque, Veracruz, 9634 | 643                           |
| <b>Silica-Calcareous Sand</b> | mix MAPSA and Arena silica del Golfo | mix CP: 97300 and 9634                                     | 609                           |
| <b>Silica -Fine Sand</b>      | Arena Silica del Golfo               | Carretera Fenquimia km 01-80, Cosoleacaque, Veracruz, 9634 | 643                           |

**Table S9.** LCA of mortars for Different sites.

| #  | Mortar   | kg CO2 eq/t  |          |         |              |
|----|----------|--------------|----------|---------|--------------|
|    |          | Dzibichaltun | Calakmul | Oxpemul | Palais Royal |
| 1  | HFD      | 497          | 615      | 637     | 294          |
| 2  | HSD      | 524          | 618      | 641     | 324          |
| 3  | HS       | 520          | 614      | 637     | 273          |
| 4  | HB       | 261          | 398      | 411     | 240          |
| 5  | HCSR     | 541          | 686      | 708     | 394          |
| 6  | HCS      | 541          | 686      | 708     | 394          |
| 7  | HSG      | 579          | 678      | 700     | 405          |
| 8  | HSP      | 605          | 700      | 722     | 415          |
| 9  | HC       | 415          | 650      | 673     | 371          |
| 10 | HCSGB    | 476          | 631      | 652     | 377          |
| 11 | AS       | 469          | 574      | 594     | 360          |
| 12 | AHCS     | 475          | 647      | 668     | 419          |
| 13 | ACSGB    | 400          | 571      | 588     | 427          |
| 14 | OAC *    | 432          | 668      | 687     | 535          |
| 15 | AC       | 432          | 668      | 687     | 535          |
| 16 | AS2      | 600          | 716      | 734     | 575          |
| 17 | H3.5CS   | 476          | 631      | 652     | 346          |
| 18 | H3.5CS2  | 444          | 637      | 659     | 355          |
| 19 | H3.5CS3  | 483          | 648      | 670     | 364          |
| 20 | H3.5CS4  | 523          | 659      | 681     | 373          |
| 21 | H3.5CS5  | 562          | 670      | 692     | 383          |
| 22 | H3.5CSG  | 465          | 625      | 646     | 355          |
| 23 | H3.5CSB  | 465          | 625      | 646     | 355          |
| 24 | H3.5CSGB | 446          | 601      | 622     | 347          |

**Table S10.** Assignment of values in restoration mortars for Dzibichaltun stone.

| #  | Mortar      | Co | CA  | CS  | D1  | D2 | DE | PO | G  | W  | P   | Score |
|----|-------------|----|-----|-----|-----|----|----|----|----|----|-----|-------|
| 1  | HFD         | 64 | 97  | 43  | 76  | 98 | 56 | 82 | 50 | 82 | 648 |       |
| 2  | HSD         | 75 | 94  | 42  | 85  | 92 | 50 | 82 | 48 | 81 | 648 |       |
| 3  | HS          | 56 | 97  | 37  | 89  | 92 | 56 | 82 | 48 | 81 | 638 |       |
| 4  | HB          | 0  | 87  | 41  | 96  | 85 | 31 | 72 | 74 | 87 | 572 |       |
| 5  | HCSR        | 0  | 100 | 61  | 81  | 86 | 52 | 78 | 46 | 76 | 580 |       |
| 6  | HCS         | 0  | 86  | 57  | 67  | 86 | 54 | 79 | 46 | 76 | 550 |       |
| 7  | HSG         | 0  | 88  | 103 | 86  | 89 | 64 | 83 | 42 | 76 | 630 |       |
| 8  | HSP         | 10 | 87  | 27  | 60  | 85 | 36 | 74 | 40 | 75 | 494 |       |
| 9  | HC          | 18 | 95  | 67  | 95  | 87 | 46 | 76 | 59 | 77 | 619 |       |
| 10 | HCSGB       | 24 | 84  | 95  | 98  | 91 | 39 | 78 | 52 | 77 | 638 |       |
| 11 | AS          | 0  | 96  | 34  | 33  | 91 | 52 | 79 | 53 | 74 | 512 |       |
| 12 | AHCS        | 8  | 91  | 40  | 44  | 86 | 48 | 76 | 53 | 71 | 516 |       |
| 13 | ACSGB       | 0  | 87  | 35  | 71  | 82 | 26 | 75 | 60 | 66 | 502 |       |
| 14 | OAC *       | 0  | 86  | 36  | 48  | 82 | 34 | 72 | 57 | 57 | 472 |       |
| 15 | AC          | 0  | 77  | 40  | 25  | 87 | 20 | 67 | 57 | 57 | 429 |       |
| 16 | AS2         | 11 | 82  | 30  | 69  | 54 | 28 | 70 | 40 | 56 | 439 |       |
| 17 | H3.5CS      | 4  | 82  | 46  | 41  | 82 | 38 | 72 | 52 | 77 | 493 |       |
| 18 | H3.5CS2     | 0  | 82  | 42  | 64  | 81 | 36 | 71 | 56 | 77 | 508 |       |
| 19 | H3.5CS3     | 0  | 92  | 50  | 73  | 84 | 43 | 75 | 52 | 74 | 543 |       |
| 20 | H3.5CS4     | 0  | 85  | 39  | 54  | 84 | 43 | 75 | 48 | 74 | 501 |       |
| 21 | H3.5CS5     | 0  | 88  | 42  | 76  | 85 | 47 | 76 | 44 | 73 | 530 |       |
| 22 | H3.5CSG     | 0  | 97  | 54  | 84  | 84 | 37 | 78 | 54 | 73 | 560 |       |
| 23 | H3.5CSB     | 14 | 98  | 55  | 79  | 84 | 38 | 77 | 54 | 74 | 573 |       |
| 24 | H3.5CSGB    | 63 | 96  | 68  | 100 | 84 | 34 | 75 | 55 | 75 | 650 |       |
| 25 | Lithomex    | 51 | 76  | 90  | 85  | 85 | 36 | 80 | 50 | 38 | 591 |       |
| 26 | Artropierre | 0  | 88  | 90  | 85  | 85 | 26 | 73 | 50 | 38 | 535 |       |
| 27 | Altapierre  | 65 | 95  | 0   | 85  | 85 | 57 | 87 | 50 | 38 | 562 |       |



**Table S11.** Assignment of values in restoration mortars for Calakmul.

| #  | Mortar      | Co | CA  | CS  | D1  | PO  | GWP | Score  |
|----|-------------|----|-----|-----|-----|-----|-----|--------|
| 1  | HFD         | 71 | 97  | 80  | 76  | 95  | 39  | 82 539 |
| 2  | HSD         | 80 | 94  | 79  | 85  | 95  | 38  | 81 552 |
| 3  | HS          | 81 | 97  | 74  | 89  | 95  | 39  | 81 555 |
| 4  | HB          | 0  | 87  | 78  | 96  | 85  | 60  | 87 493 |
| 5  | HCSR        | 0  | 100 | 98  | 81  | 91  | 31  | 76 477 |
| 6  | HCS         | 2  | 86  | 94  | 67  | 92  | 31  | 76 448 |
| 7  | HSG         | 0  | 88  | 140 | 86  | 96  | 32  | 76 518 |
| 8  | HSP         | 0  | 87  | 64  | 60  | 87  | 30  | 75 403 |
| 9  | HC          | 0  | 95  | 104 | 95  | 89  | 35  | 77 495 |
| 10 | HCSGB       | 1  | 84  | 132 | 98  | 91  | 37  | 77 520 |
| 11 | AS          | 0  | 96  | 71  | 33  | 92  | 43  | 74 409 |
| 12 | AHCS        | 0  | 91  | 77  | 44  | 89  | 35  | 71 407 |
| 13 | ACSGB       | 0  | 87  | 72  | 71  | 88  | 43  | 66 426 |
| 14 | OAC *       | 0  | 86  | 73  | 48  | 85  | 33  | 57 382 |
| 15 | AC          | 0  | 77  | 77  | 25  | 80  | 33  | 57 349 |
| 16 | AS2         | 0  | 82  | 67  | 69  | 83  | 28  | 56 385 |
| 17 | H3.5CS      | 0  | 82  | 82  | 41  | 85  | 37  | 77 404 |
| 18 | H3.5CS2     | 0  | 82  | 79  | 64  | 84  | 36  | 77 422 |
| 19 | H3.5CS3     | 0  | 92  | 87  | 73  | 88  | 35  | 74 449 |
| 20 | H3.5CS4     | 0  | 85  | 76  | 54  | 88  | 34  | 74 410 |
| 21 | H3.5CS5     | 0  | 88  | 78  | 76  | 89  | 33  | 73 438 |
| 22 | H3.5CSG     | 0  | 97  | 91  | 84  | 91  | 38  | 73 473 |
| 23 | H3.5CSB     | 0  | 98  | 92  | 79  | 90  | 38  | 74 471 |
| 24 | H3.5CSGB    | 28 | 96  | 105 | 100 | 88  | 40  | 75 532 |
| 25 | Lithomex    | 26 | 76  | 127 | 85  | 93  | 50  | 38 494 |
| 26 | Artropierre | 0  | 88  | 127 | 85  | 86  | 50  | 38 473 |
| 27 | Altapierre  | 62 | 95  | 0   | 85  | 100 | 50  | 38 430 |

**Table S12.** Assignment of values in restoration mortars for Oxpemul stones.

| #  | Mortar      | Co  | CAC | S  | D1  | D2 | DE | PO  | G  | P  | Score |
|----|-------------|-----|-----|----|-----|----|----|-----|----|----|-------|
| 1  | HFD         | 77  | 97  | 0  | 76  | 98 | 65 | 88  | 36 | 82 | 619   |
| 2  | HSD         | 89  | 94  | 0  | 85  | 92 | 71 | 88  | 36 | 81 | 636   |
| 3  | HS          | 69  | 97  | 0  | 89  | 92 | 65 | 88  | 36 | 81 | 617   |
| 4  | HB          | 0   | 87  | 0  | 96  | 85 | 90 | 98  | 59 | 87 | 602   |
| 5  | HCSR        | 0   | 100 | 16 | 81  | 86 | 69 | 92  | 29 | 76 | 549   |
| 6  | HCS         | 24  | 86  | 12 | 67  | 86 | 67 | 91  | 29 | 76 | 538   |
| 7  | HSG         | 3.4 | 88  | 58 | 86  | 89 | 57 | 87  | 30 | 76 | 574   |
| 8  | HSP         | 13  | 87  | 0  | 60  | 85 | 85 | 96  | 28 | 75 | 529   |
| 9  | HC          | 20  | 95  | 22 | 95  | 87 | 75 | 94  | 33 | 77 | 597   |
| 10 | HCSGB       | 23  | 84  | 50 | 98  | 91 | 83 | 92  | 35 | 77 | 632   |
| 11 | AS          | 0   | 96  | 0  | 33  | 91 | 69 | 91  | 41 | 74 | 495   |
| 12 | AHCS        | 10  | 91  | 0  | 44  | 86 | 73 | 94  | 33 | 71 | 502   |
| 13 | ACSGB       | 0   | 87  | 0  | 71  | 82 | 95 | 95  | 41 | 66 | 537   |
| 14 | OAC *       | 0   | 86  | 0  | 48  | 82 | 87 | 98  | 31 | 57 | 489   |
| 15 | AC          | 0   | 77  | 0  | 25  | 87 | 99 | 97  | 31 | 57 | 473   |
| 16 | AS2         | 17  | 82  | 0  | 69  | 54 | 93 | 100 | 27 | 56 | 498   |
| 17 | H3.5CS      | 3   | 82  | 1  | 41  | 82 | 83 | 98  | 35 | 77 | 501   |
| 18 | H3.5CS2     | 0   | 82  | 0  | 64  | 81 | 85 | 99  | 34 | 77 | 522   |
| 19 | H3.5CS3     | 0   | 92  | 5  | 73  | 84 | 78 | 95  | 33 | 74 | 534   |
| 20 | H3.5CS4     | 0   | 85  | 0  | 54  | 84 | 78 | 95  | 32 | 74 | 501   |
| 21 | H3.5CS5     | 0   | 88  | 0  | 76  | 85 | 74 | 94  | 31 | 73 | 521   |
| 22 | H3.5CSG     | 0   | 97  | 9  | 84  | 84 | 85 | 92  | 35 | 73 | 559   |
| 23 | H3.5CSB     | 11  | 98  | 10 | 79  | 84 | 83 | 93  | 35 | 74 | 568   |
| 24 | H3.5CSGB    | 51  | 96  | 23 | 100 | 84 | 87 | 95  | 38 | 75 | 649   |
| 25 | Lithomex    | 52  | 76  | 45 | 85  | 85 | 85 | 90  | 50 | 38 | 606   |
| 26 | Artropierre | 0   | 88  | 45 | 85  | 85 | 95 | 97  | 50 | 38 | 582   |
| 27 | Altapierre  | 79  | 95  | 0  | 85  | 85 | 64 | 83  | 50 | 38 | 579   |

## References

- Isai de los Angeles Che Novelo, tesis: ESTUDIO DEL COMPORTAMIENTO DE UN HIDROFUGANTE BAJO ACCIÓN DE SALES EN CONDICIONES NATURALES Y ACELERADAS."CICOOR, Campeche, México 2014.
- Tagnit-Hammou, M. Master th  sis *Caract  risation de la Qualit   de L'Interface Mortier-Pierre*; CY Cergy-Paris Universit  , 2015.
- Fern  ndez, J.M.; Duran, A.; Navarro-Blasco, I.; Lanas, J.; Sirera, R.; Alvarez, J.I. Influence of nanosilica and a polycarboxylate ether superplasticizer on the performance of lime mortars. *Cem. Concr. Res.* **2013**, *43*, 12–24. <https://doi.org/10.1016/j.cemconres.2012.10.007>.
- Izaguirre, A.; Lanas, J.;   lvarez, J. Effect of water-repellent admixtures on the behaviour of aerial lime-based mortars. *Cem. Concr. Res.* **2009**, *39*, 1095–1104. <https://doi.org/10.1016/j.cemconres.2009.07.026>.
- Pourchez, J.; Peschard, A.; Grosseau, P.; Guyonnet, R.; Guilhot, B.; Vall  e, F. HPMC and HEMC influence on cement hydration, *Cem. Concr. Res.* **2006**, *36*, 288–294. <https://doi.org/10.1016/j.cemconres.2005.08.003>.
- Thirumalini, S.; Ravi, R.; Rajesh, M. Experimental investigation on physical and mechanical properties of lime mortar: Effect of organic addition. *J. Cult. Herit.* **2018**, *31*, 97–104. <https://doi.org/10.1016/j.culher.2017.10.009>.
- Ord   ez, A.; Melken, G.; Rodr  guez, C.; G  mez, J.; Navarrete, N. Mortero arquitect  nico a base de resina del   rbol de chukum. In *ISSN 2594-018X A  o 4, N  m.2, Vol.VII, Julio-Diciembre 2019*; Edici  n Especial; Instituto Tecnol  gico de Chetumal, Chetumal, M  xico, 2019; pp. 107–114. Available online: <https://www.latindex.org/latindex/ficha?folio=14107> (accessed on 30 December 2021).
- Rampazzi, L.; Colombini, M.P.; Conti, C.; Corti, C.; Lluveras-Tenorio, A.; Sansonetti, A.; Zanaboni, M. Technology of Medieval Mortars: An Investigation into the Use of Organic Additives. *Archaeometry* **2015**, *58*, 115–130. <https://doi.org/10.1111/arcm.12155>.
- Acharya, A. Archory Shubhjeet, Gokhale Vasudha, Role of Additives in Mortars: Historic Precedents. *Int. J. Eng. Res. Appl.* **2017**, *7*, 7–12. <https://doi.org/https://doi.org/10.9790/9622-0702050712>.
- Thirumalini, P.T.P.; Sekar, S.K. Review on Herbs used as Admixture in Lime Mortar used in Ancient Structures. *Indian J. Appl. Res.* **2011**, *3*, 295–298. <https://doi.org/10.15373/2249555X/AUG2013/93>.

80. Pachta, V.; Papayianni, I. Influence of resins on the properties of lime-pozzolan grouts for surface consolidation. In Proceedings of the 4th Historical Mortar Conference HMC2016, Santorini, Greece, 10–12 October 2016. Available online: [https://www.researchgate.net/publication/310603700\\_Influence\\_of\\_resins\\_on\\_the\\_properties\\_of\\_lime-pozzolan\\_grouts\\_for\\_surface\\_consolidation](https://www.researchgate.net/publication/310603700_Influence_of_resins_on_the_properties_of_lime-pozzolan_grouts_for_surface_consolidation) (accessed on 30 December 2021).
81. Aggarwal, L.; Thapliyal, P.; Karade, S. Properties of polymer-modified mortars using epoxy and acrylic emulsions. *Constr. Build. Mater.* **2007**, *21*, 379–383. <https://doi.org/10.1016/j.conbuildmat.2005.08.007>.
82. Izaguirre, A.; Lanas, J.; Álvarez, J. Behaviour of a starch as a viscosity modifier for aerial lime-based mortars. *Carbohydr. Polym.* **2010**, *80*, 222–228. <https://doi.org/10.1016/j.CARBOL.2009.11.010>.
83. Rosato, L.; Stefanidou, M.; Milazzo, G.; Fernandez, F.; Livreri, P.; Muratore, N.; Terranova, L. Study and evaluation of nano-structured cellulose fibers as additive for restoration of historical mortars and plasters. *Mater. Today Proc.* **2017**, *4*, 6954–6965. <https://doi.org/10.1016/j.matpr.2017.07.025>.
84. Sousa, S.; Ribeiro, M.; Cruz, E.; Barrera, G.; Ferreira, A. Mechanical behaviour analysis of polyester polymer mortars reinforced with tire rubber fibres. *Ciência Tecnol. Dos Mater.* **2017**, *29*, e162–e166. <https://doi.org/10.1016/j.ctmat.2016.07.009>.
85. Izaguirre, A.; Lanas, J.; Álvarez, J. Ageing of lime mortars with admixtures: Durability and strength assessment. *Cem. Concr. Res.* **2010**, *40*, 1081–1095. <https://doi.org/10.1016/j.cemconres.2010.02.013>.
86. Theobald, M.; Plank, J.  $\beta$ -Naphthalene sulfonate formaldehyde-based nanocomposites as new seeding materials for Portland cement. *Constr. Build. Mater.* **2020**, *264*, 120240. <https://doi.org/10.1016/j.conbuildmat.2020.120240>.
87. Silva, B.; Pinto, A.P.F.; Gomes, A.; Candeias, A. Admixtures potential role on the improvement of the freeze-thaw resistance of lime mortars. *J. Build. Eng.* **2021**, *35*, 101977. <https://doi.org/10.1016/j.jobbe.2020.101977>.
88. González-Sánchez, J.; Taşci, B.; Fernández, J.; Navarro-Blasco, J.; Alvarez, J. Improvement of the depolluting and self-cleaning abilities of air lime mortars with dispersing admixtures. *J. Clean. Prod.* **2021**, *292*, 126069. <https://doi.org/10.1016/j.jclepro.2021.126069>.
89. Łaźniewska-Piekarczyk, B.; Szwabowski, J. The Influence of the Type of AntiFoaming Admixture and Superplasticizer on the Properties of Self-Compacting Mortar and Concrete. *J. Civ. Eng. Manag.* **2012**, *18*, 408–415. <https://doi.org/10.3846/13923730.2012.698908>.
90. The Pigments Place. Available online: <https://Thepigmentplace.Com/Collections/Lime-Stable>. (accessed on 30 December 2021).
91. Gil, M.; Veiga, M.; Aguiar, J.; Seruya, A.; Carvalho, L.; Vargas, H.; Mirao, J.; Candeias, A. Limewash paintings and colored lime mortars. In Proceedings of the Historical Mortars Conference, Lisbon, LNEC, Lisbon, Portugal, 24–26 September 2008. Available online: [https://www.researchgate.net/publication/287195231\\_limewash\\_paintings\\_and\\_colored\\_lime\\_mortars](https://www.researchgate.net/publication/287195231_limewash_paintings_and_colored_lime_mortars) (accessed on 30 December 2021).
92. Gallias, J.; Kara-Ali, R.; Bigas, J. The effect of fine mineral admixtures on water requirement of cement pastes. *Cem. Concr. Res.* **2000**, *30*, 1543–1549. [https://doi.org/10.1016/S0008-8846\(00\)00380-X](https://doi.org/10.1016/S0008-8846(00)00380-X).
93. Navrátilová, E.; Rovnanikova, P. Pozzolanic properties of brick powders and their effect on the properties of modified lime mortars. *Constr. Build. Mater.* **2016**, *120*, 530–539. <https://doi.org/10.1016/j.conbuildmat.2016.05.062>.
94. Ferrari, A.M.; Pini, M.; Neri, P.; Bondioli, F. Nano-TiO<sub>2</sub> Coatings for Limestone: Which Sustainability for Cultural Heritage? *Coatings* **2015**, *5*, 232–245. <https://doi.org/10.3390/coatings5030232>.
95. Barberena-Fernández, A.; Blanco-Varela, M.; Carmona-Quiroga, P. Use of nanosilica- or nanolime-added TEOS to consolidate cementitious materials in heritage structures: Physical and mechanical properties of mortars. *Cem. Concr. Compos.* **2019**, *95*, 271–276. <https://doi.org/10.1016/j.cemconcomp.2018.09.011>.
96. Nunes, C.; Slížková, Z.; Stefanidou, M.; Němeček, J. Microstructure of lime and lime-pozzolana pastes with nanosilica. *Cem. Concr. Res.* **2016**, *83*, 152–163. <https://doi.org/10.1016/j.cemconres.2016.02.004>.
